# Supplementary material for: Functional characterization of GmBZL2 (AtBZR1 like gene) reveals the conserved BR signaling regulation in Glycine max
Source: PubMed Central journal article supplement (PMC4976319; doi:10.1038/srep31134), 2016-08-08
Supplement: srep31134-s1.pdf [file srep31134-s1.pdf]

(a) Expression Quantification of *GmBZL1*

| Expression Quantification      |                         |         |
|--------------------------------|-------------------------|---------|
| There are 28 expression assays |                         |         |
| Experiment Name                | Experiment Group        | FPKM    |
| Flower                         | Tissue Sample           | 7.87142 |
| Flower open                    | GeneAtlas Tissue Sample | 5.535   |
| Flower unopen                  | GeneAtlas Tissue Sample | 4.539   |
| Lateral root standard          | GeneAtlas Tissue Sample | 5.113   |
| Leaf anthesis                  | GeneAtlas Tissue Sample | 4.551   |
| Leaf ribate                    | GeneAtlas Tissue Sample | 4.349   |
| Leaf standard                  | GeneAtlas Tissue Sample | 4.839   |
| Leaf symbiotic condition       | GeneAtlas Tissue Sample | 4.46    |
| Leaf urea                      | GeneAtlas Tissue Sample | 4.812   |
| Leaves                         | Tissue Sample           | 5.1484  |
| Nodes                          | Tissue Sample           | 6.5268  |
| Nodes symbiotic condition      | GeneAtlas Tissue Sample | 6.666   |
| Plot                           | Tissue Sample           | 8.5525  |
| Root                           | Tissue Sample           | 8.8989  |
| Root anthesis                  | GeneAtlas Tissue Sample | 1.336   |
| Root hairs                     | Tissue Sample           | 12.5793 |
| Root ribate                    | GeneAtlas Tissue Sample | 1.346   |
| Root standard                  | GeneAtlas Tissue Sample | 8.926   |
| Root symbiotic condition       | GeneAtlas Tissue Sample | 1.979   |
| Root tip standard              | GeneAtlas Tissue Sample | 5.7     |
| Root urea                      | GeneAtlas Tissue Sample | 1.952   |
| Seed                           | Tissue Sample           | 7.22493 |
| Shoot Apical Meristem          | Tissue Sample           | 15.1282 |
| Shoot tip standard             | GeneAtlas Tissue Sample | 8.934   |
| Stem                           | Tissue Sample           | 14.3446 |
| Stem standard                  | GeneAtlas Tissue Sample | 8.938   |

(b) Expression Quantification of *GmBZL2*

| Expression Quantification      |                         |         |
|--------------------------------|-------------------------|---------|
| There are 28 expression assays |                         |         |
| Experiment Name                | Experiment Group        | FPKM    |
| Flower                         | Tissue Sample           | 17.8058 |
| Flower open                    | GeneAtlas Tissue Sample | 8.172   |
| Flower unopen                  | GeneAtlas Tissue Sample | 3.868   |
| Lateral root standard          | GeneAtlas Tissue Sample | 2.146   |
| Leaf anthesis                  | GeneAtlas Tissue Sample | 2.898   |
| Leaf ribate                    | GeneAtlas Tissue Sample | 2.866   |
| Leaf standard                  | GeneAtlas Tissue Sample | 2.708   |
| Leaf symbiotic condition       | GeneAtlas Tissue Sample | 3.082   |
| Leaf urea                      | GeneAtlas Tissue Sample | 2.905   |
| Leaves                         | Tissue Sample           | 4.40739 |
| Nodes                          | Tissue Sample           | 3.6962  |
| Nodes symbiotic condition      | GeneAtlas Tissue Sample | 0.477   |
| Plot                           | Tissue Sample           | 4.74932 |
| Root                           | Tissue Sample           | 8.23293 |
| Root anthesis                  | GeneAtlas Tissue Sample | 1.648   |
| Root hairs                     | Tissue Sample           | 5.92523 |
| Root ribate                    | GeneAtlas Tissue Sample | 1.959   |
| Root standard                  | GeneAtlas Tissue Sample | 0.848   |
| Root symbiotic condition       | GeneAtlas Tissue Sample | 1.337   |
| Root tip standard              | GeneAtlas Tissue Sample | 2.216   |
| Root urea                      | GeneAtlas Tissue Sample | 1.075   |
| Seed                           | Tissue Sample           | 2.154   |
| Shoot Apical Meristem          | Tissue Sample           | 5.41683 |
| Shoot tip standard             | GeneAtlas Tissue Sample | 3.651   |
| Stem                           | Tissue Sample           | 7.47842 |
| Stem standard                  | GeneAtlas Tissue Sample | 4.247   |

(c) Expression Quantification of *GmBZL3*

| Expression Quantification      |                         |         |
|--------------------------------|-------------------------|---------|
| There are 28 expression assays |                         |         |
| Experiment Name                | Experiment Group        | FPKM    |
| Flower                         | Tissue Sample           | 4.1824  |
| Flower open                    | GeneAtlas Tissue Sample | 4.68    |
| Flower unopen                  | GeneAtlas Tissue Sample | 6.787   |
| Lateral root standard          | GeneAtlas Tissue Sample | 2.553   |
| Leaf anthesis                  | GeneAtlas Tissue Sample | 7.753   |
| Leaf ribate                    | GeneAtlas Tissue Sample | 6.356   |
| Leaf standard                  | GeneAtlas Tissue Sample | 4.447   |
| Leaf symbiotic condition       | GeneAtlas Tissue Sample | 8.956   |
| Leaf urea                      | GeneAtlas Tissue Sample | 5.654   |
| Leaves                         | Tissue Sample           | 5.6476  |
| Nodes                          | Tissue Sample           | 5.5656  |
| Nodes symbiotic condition      | GeneAtlas Tissue Sample | 9.953   |
| Plot                           | Tissue Sample           | 27.591  |
| Root                           | Tissue Sample           | 3.56978 |
| Root anthesis                  | GeneAtlas Tissue Sample | 8.4     |
| Root hairs                     | Tissue Sample           | 5.9382  |
| Root ribate                    | GeneAtlas Tissue Sample | 9.567   |
| Root standard                  | GeneAtlas Tissue Sample | 9.214   |
| Root symbiotic condition       | GeneAtlas Tissue Sample | 6.249   |
| Root tip standard              | GeneAtlas Tissue Sample | 3.952   |
| Root urea                      | GeneAtlas Tissue Sample | 9.44    |
| Seed                           | Tissue Sample           | 9.882   |
| Shoot Apical Meristem          | Tissue Sample           | 16.9477 |
| Shoot tip standard             | GeneAtlas Tissue Sample | 7.881   |
| Stem                           | Tissue Sample           | 11.5993 |
| Stem standard                  | GeneAtlas Tissue Sample | 8.895   |

(d) Expression Quantification of *GmBZL4*

| Expression Quantification      |                         |         |
|--------------------------------|-------------------------|---------|
| There are 28 expression assays |                         |         |
| Experiment Name                | Experiment Group        | FPKM    |
| Flower                         | Tissue Sample           | 4.40206 |
| Flower open                    | GeneAtlas Tissue Sample | 5.344   |
| Flower unopen                  | GeneAtlas Tissue Sample | 8.478   |
| Lateral root standard          | GeneAtlas Tissue Sample | 3.919   |
| Leaf anthesis                  | GeneAtlas Tissue Sample | 6.418   |
| Leaf ribate                    | GeneAtlas Tissue Sample | 4.923   |
| Leaf standard                  | GeneAtlas Tissue Sample | 5.26    |
| Leaf symbiotic condition       | GeneAtlas Tissue Sample | 3.958   |
| Leaf urea                      | GeneAtlas Tissue Sample | 4.989   |
| Leaves                         | Tissue Sample           | 2.3867  |
| Nodes                          | Tissue Sample           | 9.98532 |
| Nodes symbiotic condition      | GeneAtlas Tissue Sample | 8.888   |
| Plot                           | Tissue Sample           | 6.81291 |
| Root                           | Tissue Sample           | 3.86844 |
| Root anthesis                  | GeneAtlas Tissue Sample | 8.553   |
| Root hairs                     | Tissue Sample           | 8.47919 |
| Root ribate                    | GeneAtlas Tissue Sample | 1.978   |
| Root standard                  | GeneAtlas Tissue Sample | 1.4     |
| Root symbiotic condition       | GeneAtlas Tissue Sample | 6.438   |
| Root tip standard              | GeneAtlas Tissue Sample | 6.915   |
| Root urea                      | GeneAtlas Tissue Sample | 8.998   |
| Seed                           | Tissue Sample           | 7.70541 |
| Shoot Apical Meristem          | Tissue Sample           | 19.6148 |
| Shoot tip standard             | GeneAtlas Tissue Sample | 8.415   |
| Stem                           | Tissue Sample           | 4.46877 |
| Stem standard                  | GeneAtlas Tissue Sample | 5.481   |

Supplementary Figure S2. Expression quantification of *GmBZL1/2/3/4* in *Glycine max*. Expression quantification of *GmBZL1* (a) (<https://phytozome.jgi.doe.gov/phytomine/portal.do?externalid=PAC:30479951&class=gene>), *GmBZL2* (b) (<https://phytozome.jgi.doe.gov/phytomine/portal.do?externalid=PAC:30533621&class=gene>), *GmBZL3* (c) (<https://phytozome.jgi.doe.gov/phytomine/portal.do?externalid=PAC:30550683&class=gene>), and *GmBZL4* (d) (<https://phytozome.jgi.doe.gov/phytomine/portal.do?externalid=PAC:30488412&class=gene>).

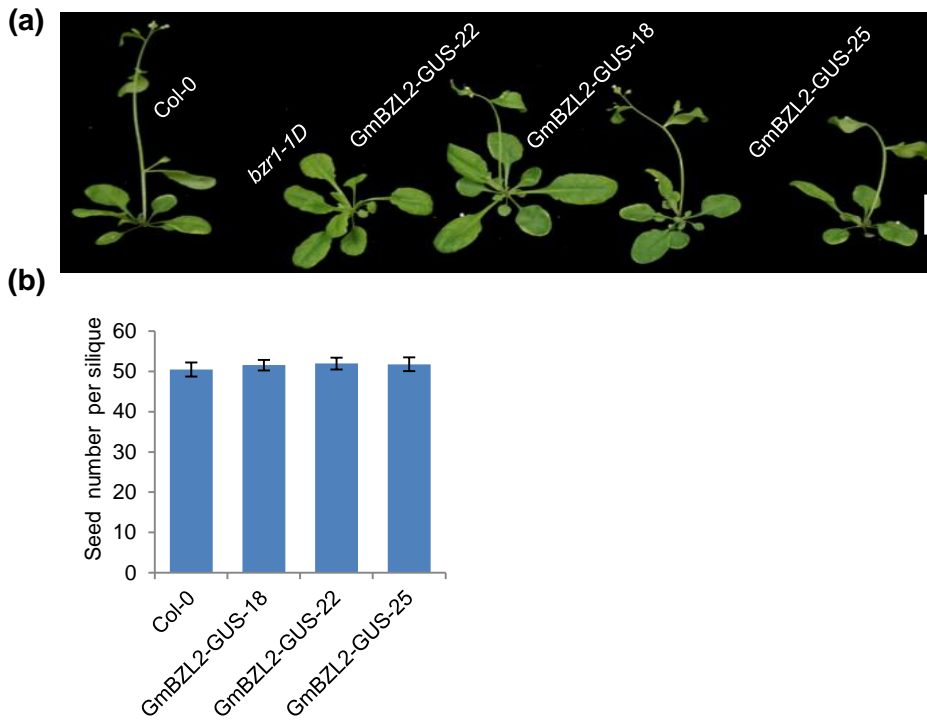

**Supplementary Figure S3. The characterization of the GmBZL2-GUS lines.** (a) The 6-week-old plants of Col-0, *bzl1-1D*, and GmBZL2-GUS transgenic lines. Bar=2 cm. (b) The seed number per silique in Col-0, *bzl1-1D*, and GmBZL2-GUS transgenic lines.

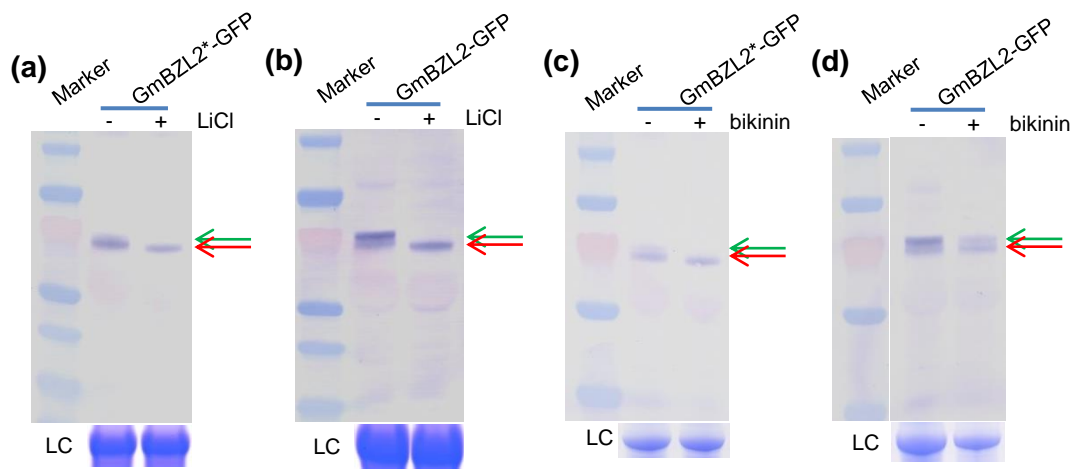

**Supplementary Figure S4. LiCl and bikinin treatments increase the ratio of dephosphorylation/phosphorylation of GmBZL2 and GmBZL2\*.** Complete elimination of phosphorylated GmBZL2\* by treatment with 100 mM LiCl in GmBZL2\*-GFP transgenic line (a) and GmBZL2-GFP transgenic line (b). The ratio of dephosphorylation/phosphorylation was increased in both GmBZL2\*-GFP transgenic lines (c) and GmBZL2-GFP transgenic line (d) with 5  $\mu$ M bikinin treatment. Ribosome bands were used as loading control. The green and red arrows indicate the phosphorylated and dephosphorylated proteins, respectively. The six protein marker belts are 130kD, 100 kD, 70 kD, 55 kD, 40 kD and 35 kD from top to bottom in (a) and (b), the five protein marker belts are 130kD, 100 kD, 70 kD, 55 kD and 35 kD from top to bottom in (c) and (d), LC indicates loading control.

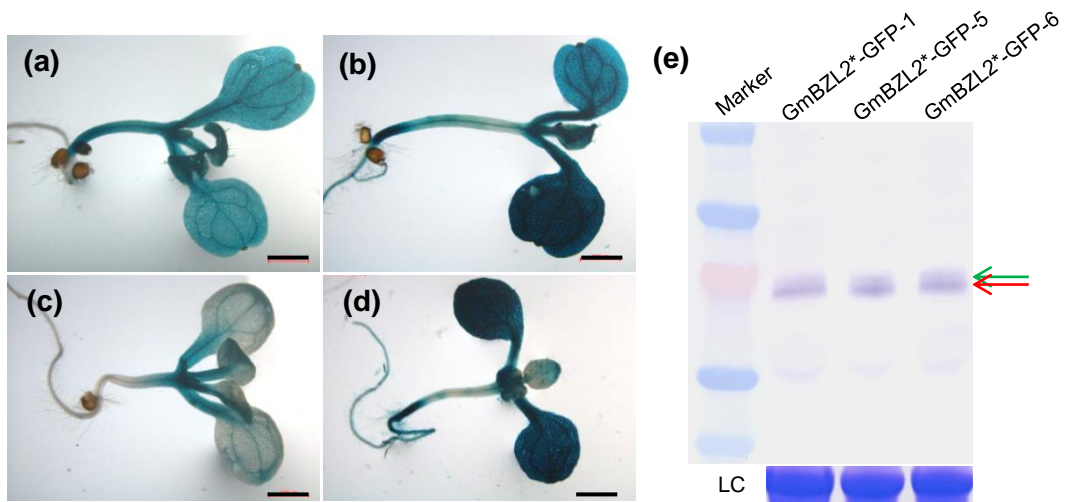

**Supplementary Figure S5. Expression level of GmBZL2\*.** (a-d) GUS staining of 7-day-old seedling of GmBZL2\*-GUS transgenic lines. Bar=1 mm. The expression level of GmBZL2\* was higher in line 4 (b) and line 9 (d) than line 1 (a) and line 7 (c). (e) Western blot analysis of GmBZL2\* protein level in GmBZL2\*-GFP transgenic lines. The ratio of dephosphorylation/phosphorylation of GmBZL2\* is higher in line 1 and line 5. The green and red arrows indicate the phosphorylated and dephosphorylated proteins, respectively. Ribosome bands were used as loading control. The five protein marker belts are 130kD, 100 kD, 70 kD, 55 kD and 40 kD from top to bottom, LC indicates loading control.

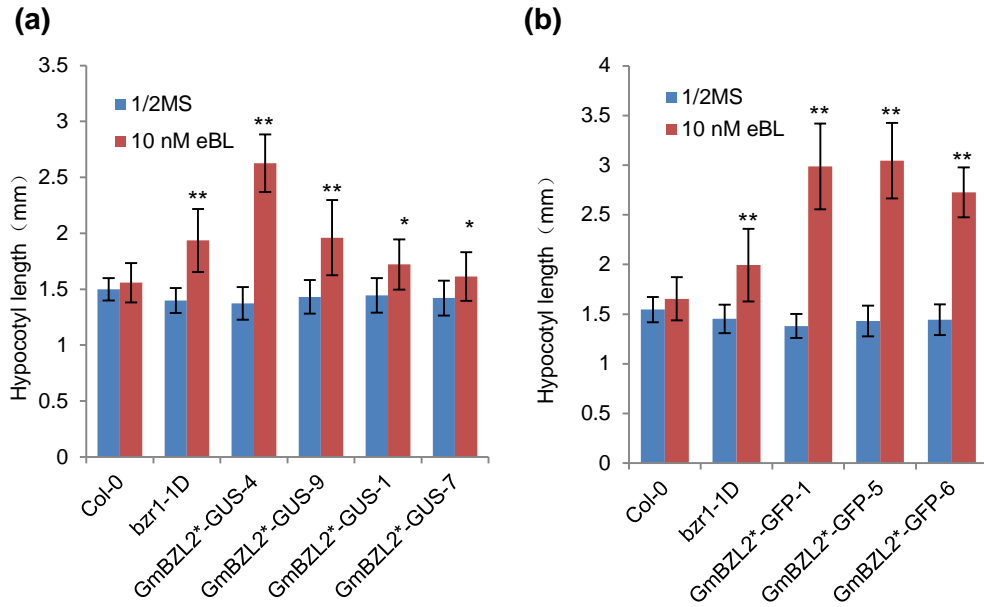

**Supplementary Figure S6. GmBZL2\* is hypersensitive to BR.** (a) Hypocotyl lengths of 7-day-old seedlings of Col-0, *bzip1-1D* and GmBZL2\*-GUS transgenic lines, which were all grown in 16 hr light and 8 hr dark on 1/2MS medium containing 0 or 10 nM eBL. The student *t* test was used to analyze the significant differences among wild type and *bzip1-1D*, GmBZL2\*-GFP transgenic lines with BR treatment (\*\**p* < 0.01, \**p* < 0.05). (b) Hypocotyl lengths of 7-day-old seedlings of Col-0, *bzip1-1D* and GmBZL2\*-GFP transgenic lines, which were all grown in 16 hr light and 8 hr dark on 1/2MS medium containing 0 or 10 nM eBL. The student *t* test was used to analyze the significant differences among wild type and *bzip1-1D*, GmBZL2\*-GFP transgenic lines with BR treatment (\*\**p* < 0.01).
